# Supplementary material
Source: Copernicus journal article supplement (doi:10.5194/egusphere-2026-1635)
Supplement: Supplementary file 1 [file egusphere-2026-1635-supplement.pdf]

Supplementary material for

# **Spatiotemporal dynamics of shear stress partitioning around vegetation in a sparsely vegetated dryland**

Pei Zhang<sup>1</sup>, Brandon L. Edwards<sup>1</sup>, John A. Gillies<sup>2</sup>, George Nikolich<sup>2</sup>, Andrew Trautz<sup>3</sup>, Brandi Wheeler<sup>1</sup>, Nancy P. Ziegler<sup>3</sup>,

<sup>1</sup>Jornada Experimental Range, New Mexico State University, Las Cruces, NM, USA.

<sup>2</sup>Division of Atmospheric Sciences, Desert Research Institute, Reno, NV, USA.

<sup>3</sup>US Army Corps of Engineers ERDC, Vicksburg, MS, USA.

*Correspondence to:* Pei Zhang (peizhang@nmsu.edu)

## **Contents of this file**

Figures S1 to S3

## **Introduction**

This supplementary material provides additional figures illustrating the scouring effects observed at several locations during the field experiment. These materials are intended to complement the main text by documenting site-specific examples of erosion features that were not included in the primary figures.

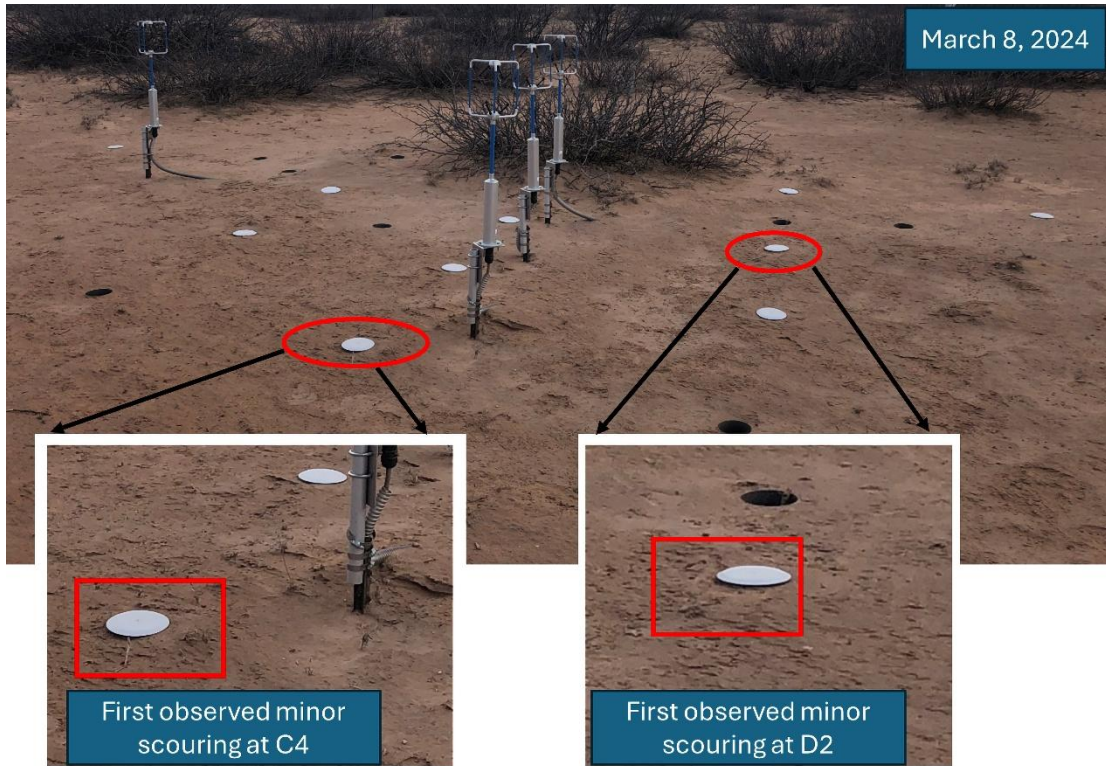

Figure S1. Minor scouring effects first observed at locations C4 and D2 on March 8, 2024.

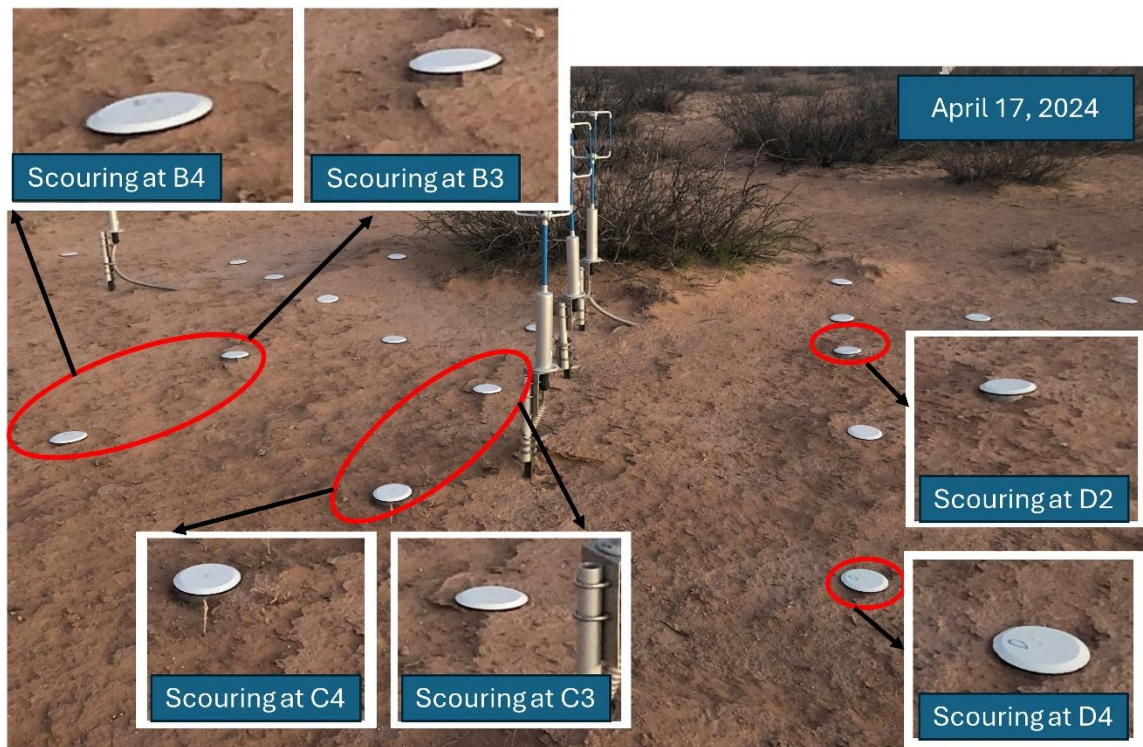

Figure S2. Scouring effects observed at six locations (B3, B4, C3, C4, D2, and D4) on April 17, 2024.

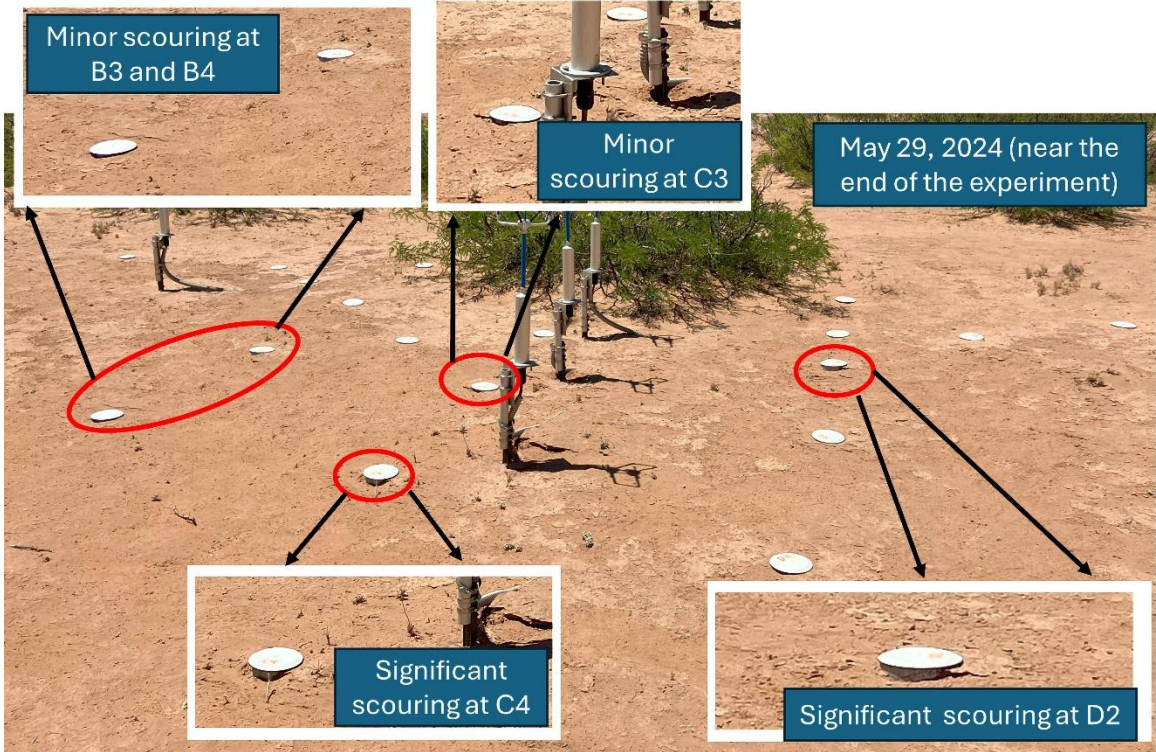

Figure S3. Scouring effects observed at five locations (B3, B4, C3, C4, and D2) near the end of the experiment on May 29, 2024.
